# Supplementary material
Source: PubMed Central journal article supplement (PMC5067846)
Supplement: Supp_Fig1.pdf [file Supp_Fig1.pdf]

## Supplementary Data

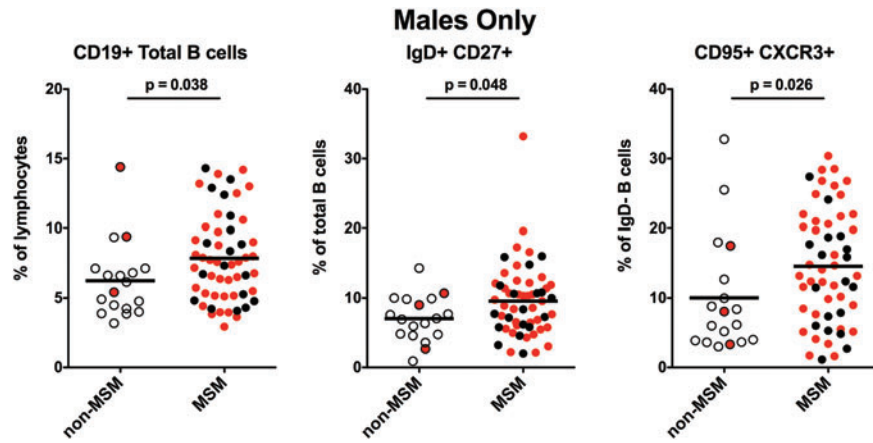

**SUPPLEMENTARY FIG. S1.** MSM analysis. Peripheral blood mononuclear cells from males only ( $n=74$ ). Each *symbol* represents an individual subject, *red* indicates HR. *Black line* represents group mean. HR, high risk; MSM, men who have sex with men.
